# Supplementary material
Source: bioRxiv or medRxiv preprint supplement (https://medrxiv.org/content/medrxiv/early/2022/01/31/2022.01.31.22270156/DC1/embed/media-1.pdf)
Supplement: Supplementary file [file media-1.pdf]

|                                                   | <b>Susceptible</b> | <b>Resistant</b> |
|---------------------------------------------------|--------------------|------------------|
| <i>N</i>                                          | 9820               | 1772             |
| <i>Age (mean (SD))</i>                            | 69.63 (20.41)      | 70.64 (17.43)    |
| <i># Hospitalizations past year (mean (SD))</i>   | 2.06 (1.53)        | 2.62 (1.97)      |
| <i>Male (N (%))</i>                               | 4462 (45.4)        | 950 (53.6)       |
| <i>Used antibiotics (N (%))</i>                   | 4999 (50.9)        | 1109 (62.6)      |
| <i>Had MRSA (N (%))</i>                           | 511 (5.2)          | 220 (12.4)       |
| <i>Had Acinetobacter (N (%))</i>                  | 66 (0.7)           | 31 (1.7)         |
| <i>Had Pseudomonas (N (%))</i>                    | 116 (1.2)          | 62 (3.5)         |
| <i>Had CRE (N (%))</i>                            | 34 (0.3)           | 16 (0.9)         |
| <i>Had VRE (N (%))</i>                            | 19 (0.2)           | 9 (0.5)          |
| <i>Had ESBL (N (%))</i>                           | 1551 (15.8)        | 697 (39.3)       |
| <i>Had KPC (N (%))</i>                            | 109 (1.1)          | 50 (2.8)         |
| <i>Culture drawn at the internal unit (N (%))</i> | 4725 (48.1)        | 921 (52.0)       |

|                                                     |             |            |
|-----------------------------------------------------|-------------|------------|
| <i>Culture drawn at the surgical unit (N (%))</i>   | 2374 (24.2) | 386 (21.8) |
| <i>Culture drawn at the orthopedic unit (N (%))</i> | 983 (10)    | 227 (12.8) |
| <i>Culture drawn at the obstetrics unit (N (%))</i> | 188 (1.9)   | 22 (1.2)   |
| <i>Culture drawn at another unit (N (%))</i>        | 531 (5.4)   | 59 (3.3)   |
| <i>Culture drawn at ER (N (%))</i>                  | 1019 (10.4) | 157 (8.9)  |
| <i>Had catheter (N (%))</i>                         | 2436 (24.8) | 689 (38.9) |
| <i>Nosocomial (N (%))</i>                           | 3752 (38.2) | 785 (44.3) |
| <i>Arrived from home (N (%))</i>                    | 5997 (61.1) | 942 (53.2) |
| <i>Arrived from an institution (N (%))</i>          | 1279 (13)   | 398 (22.5) |
| <i>Arrived from a medical clinic (N (%))</i>        | 70 (0.7)    | 14 (0.8)   |
| <i>Arrived from another hospital (N (%))</i>        | 256 (2.6)   | 72 (4.1)   |
| <i>Arrived from: unknown (N (%))</i>                | 1511 (15.4) | 216 (12.2) |
| <i>Arrived from: other (N (%))</i>                  | 707 (7.2)   | 130 (7.3)  |
| <i>Diabetes (N (%))</i>                             | 1599 (16.3) | 354 (20)   |

|                                         |             |            |
|-----------------------------------------|-------------|------------|
| <i>Immunosuppression (N (%))</i>        | 307 (4)     | 84 (4.7)   |
| <i>Sample location: urine (N (%))</i>   | 4475 (45.6) | 879 (49.6) |
| <i>Sample location: sputum (N (%))</i>  | 706 (7.2)   | 85 (4.8)   |
| <i>Sample location: wound (N (%))</i>   | 2045 (20.8) | 443 (25)   |
| <i>Sample location: blood (N (%))</i>   | 1126 (11.5) | 182 (10.3) |
| <i>Sample location: other (N (%))</i>   | 63 (0.6)    | 5 (0.3)    |
| <i>Sample location: unknown (N (%))</i> | 1405 (14.3) | 178 (10)   |
| <i>Genus: Escherichia (N (%))</i>       | 4430 (45.1) | 698 (39.4) |
| <i>Genus: Entrobacter (N (%))</i>       | 443 (4.5)   | 31 (1.7)   |
| <i>Genus: Citrobacter (N (%))</i>       | 326 (3.3)   | 5 (0.3)    |
| <i>Genus: Pseudomonas (N (%))</i>       | 2050 (20.9) | 304 (17.2) |
| <i>Genus: Proteus (N (%))</i>           | 848 (8.6)   | 273 (15.4) |
| <i>Genus: Klebsiella (N (%))</i>        | 1411 (14.4) | 410 (23.1) |
| <i>Genus: Morganella (N (%))</i>        | 312 (3.2)   | 51 (2.9)   |

**Table S1.** Summary of the covariates used in this study, stratified by gentamicin resistance results. #: number of. MRSA: Methicillin-resistant *Staphylococcus aureus*. ER: emergency room. *Used antibiotics*: hospital use of antibiotics inducing gentamicin resistance during the 6 months prior to the bacterial culture's drawing.

| Covariate name                              | Meaning                                                                                                                                                                                                                                                                                                        |
|---------------------------------------------|----------------------------------------------------------------------------------------------------------------------------------------------------------------------------------------------------------------------------------------------------------------------------------------------------------------|
| <i>Culture drawn at ER (Emergency Room)</i> | A binary covariate and a level of the categorical covariate <i>Unit</i> described below. It indicates whether the patient's culture was drawn at the ER ( <i>Emergency Room</i> )                                                                                                                              |
| <i>Male</i>                                 | A binary covariate indicating whether the patient is a male                                                                                                                                                                                                                                                    |
| <i>Used antibiotics</i>                     | A binary covariate indicating whether the patient used any of the following antibiotics inducing gentamicin resistance (19) in the hospital during the 6 months prior to the bacterial culture's drawing: any aminoglycosides, ciprofloxacin, ceftazidime, cefuroxime, sulfamethoxazole\trimethoprim, imipenem |
| <i>Had MRSA</i>                             | A binary covariate indicating whether the patient had a resistant strain of Methicillin-resistant <i>Staphylococcus aureus</i> (MRSA) during the year prior to the bacterial culture sampling                                                                                                                  |
| <i>Age, in years</i>                        | The patient's age at the time of the bacterial culture sampling                                                                                                                                                                                                                                                |
| <i># Hospitalizations past year</i>         | The number of times the patient was hospitalized during the year prior to the bacterial culture sampling                                                                                                                                                                                                       |
| <i>Had Acinetobacter</i>                    | A binary covariate indicating whether the patient had an infection with a resistant strain of <i>Acinetobacter</i> in the hospital during the year prior to the bacterial culture sampling                                                                                                                     |
| <i>Had Pseudomonas</i>                      | A binary covariate indicating whether the patient had an infection with a resistant strain of <i>Pseudomonas</i> in the hospital during the year prior to the bacterial culture sampling                                                                                                                       |
| <i>Had CRE</i>                              | A binary covariate indicating whether the patient had an infection with a resistant strain of Carbapenem-resistant <i>Enterobacteriaceae</i> (CRE) in the hospital during the year prior to the bacterial culture sampling                                                                                     |
| <i>Had VRE</i>                              | A binary covariate indicating whether the patient had an infection with a resistant strain of Vancomycin-resistant <i>Enterococcus</i> (VRE) in the hospital during the year prior to the bacterial culture sampling                                                                                           |
| <i>Had ESBL</i>                             | A binary covariate indicating whether the patient had an infection with a resistant strain of Extended-spectrum beta-lactamase (ESBL) in the hospital during the year prior to the bacterial culture sampling                                                                                                  |

|                          |                                                                                                                                                                                                                                                                               |
|--------------------------|-------------------------------------------------------------------------------------------------------------------------------------------------------------------------------------------------------------------------------------------------------------------------------|
| <i>Had KPC</i>           | A binary covariate indicating whether the patient had an infection with a resistant strain of <i>Klebsiella pneumoniae</i> carbapenemase ( <i>KPC</i> ) in the hospital during the year prior to the bacterial culture sampling                                               |
| <i>Unit</i>              | A categorical covariate indicating the unit in which the patient's culture was sampled. Its reference group is the internal unit, as it was the most prevalent. The levels of this covariate are: Internal, ER (emergency room), surgical, orthopedic, obstetrics and another |
| <i>Had catheter</i>      | A binary covariate indicating whether the patient had a catheter installation before the bacterial culture sampling                                                                                                                                                           |
| <i>Nosocomial</i>        | A binary covariate indicating if the bacterial culture was drawn from the patient after more than 48 hours upon arrival at the hospital. In such cases a suspicion arises that the patient had a hospital-acquired infection                                                  |
| <i>Arrived from</i>      | A categorical covariate indicating from where the patient arrived at the hospital. Its reference group is 'home', as it was the most prevalent. The levels of this covariate are: home, institution, medical clinic, another hospital and other                               |
| <i>Diabetes</i>          | A binary covariate indicating whether the patient was diagnosed with diabetes before the bacterial culture sampling                                                                                                                                                           |
| <i>Immunosuppression</i> | A binary covariate indicating whether the patient was diagnosed with immunosuppression before the bacterial culture sampling                                                                                                                                                  |

|                                                           |                                                                                                                                                                                                                                                                                                                     |
|-----------------------------------------------------------|---------------------------------------------------------------------------------------------------------------------------------------------------------------------------------------------------------------------------------------------------------------------------------------------------------------------|
| <p style="text-align: center;"><i>Sample location</i></p> | <p>A categorical covariate indicating the location from which the bacterial culture was sampled from the patient. Its reference group is urine, as it was the most prevalent. The levels of this covariate are: sputum, wound, blood, unknown and other</p>                                                         |
| <p style="text-align: center;"><i>Genus</i></p>           | <p>A categorical covariate indicating the genus of bacteria. Its reference group is <i>Escherichia</i>, as it was the most prevalent. The levels of this covariate are: <i>Escherichia</i>, <i>Entrobacter</i>, <i>Citrobacter</i>, <i>Pseudomonas</i>, <i>Proteus</i>, <i>Klebsiella</i> and <i>Morganella</i></p> |

**Table S2.** Description of the covariates used in this study. #: number of.

| <b>Standard logistic model</b>       |                    |                        |                |
|--------------------------------------|--------------------|------------------------|----------------|
| <i>Covariate</i>                     | <i>Odds Ratios</i> | <i>Conf. Int (95%)</i> | <i>P-Value</i> |
| (Intercept)                          | 0.09               | 0.07 – 0.12            | <0.001         |
| Age (/5)                             | 0.98               | 0.97 – 1.00            | 0.028          |
| Times hospitalized past year (/3)    | 1.24               | 1.11 – 1.38            | <0.001         |
| Had Acinetobacter                    | 2.05               | 1.23 – 3.35            | 0.005          |
| Had Pseudomonas                      | 1.95               | 1.38 – 2.74            | <0.001         |
| Had CRE                              | 1.54               | 0.78 – 2.90            | 0.194          |
| Had VRE                              | 0.64               | 0.25 – 1.54            | 0.335          |
| Had ESBL                             | 2.63               | 2.33 – 2.96            | <0.001         |
| Had KPC                              | 1.80               | 1.23 – 2.60            | 0.002          |
| Culture drawn at the surgical unit   | 0.95               | 0.82 – 1.12            | 0.562          |
| Culture drawn at the orthopedic unit | 1.40               | 1.13 – 1.74            | 0.002          |
| Culture drawn at the obstetrics unit | 1.13               | 0.61 – 2.07            | 0.692          |
| Culture drawn at other unit          | 0.65               | 0.46 – 0.90            | 0.011          |
| Had catheter                         | 1.26               | 1.09 – 1.44            | 0.001          |
| Nosocomial                           | 1.26               | 1.12 – 1.43            | <0.001         |
| Arrived from an institution          | 1.43               | 1.23 – 1.66            | <0.001         |
| Arrived from a medical clinic        | 0.96               | 0.50 – 1.73            | 0.885          |
| Arrived from another hospital        | 1.33               | 0.97 – 1.80            | 0.069          |
| Arrived from: unknown                | 0.99               | 0.66 – 1.46            | 0.943          |
| Arrived from: other                  | 0.97               | 0.78 – 1.20            | 0.767          |
| Diabetes                             | 1.02               | 0.89 – 1.18            | 0.775          |
| Immunosuppression                    | 1.23               | 0.95 – 1.58            | 0.115          |
| Sample location: unknown             | 0.64               | 0.53 – 0.78            | <0.001         |
| Sample location: sputum              | 0.45               | 0.34 – 0.59            | <0.001         |
| Sample location: wound               | 0.96               | 0.81 – 1.14            | 0.670          |
| Sample location: blood               | 0.78               | 0.65 – 0.93            | 0.007          |



|                        |       |             |        |
|------------------------|-------|-------------|--------|
| Sample location: other | 0.72  | 0.24 – 1.69 | 0.493  |
| Genus: Entrobacter     | 0.46  | 0.30 – 0.66 | <0.001 |
| Genus: Citrobacter     | 0.10  | 0.04 – 0.22 | <0.001 |
| Genus: Pseudomonas     | 0.81  | 0.69 – 0.95 | 0.011  |
| Genus: Proteus         | 1.60  | 1.35 – 1.90 | <0.001 |
| Genus: Klebsiella      | 1.62  | 1.40 – 1.86 | <0.001 |
| Genus: Morganella      | 0.80  | 0.57 – 1.11 | 0.194  |
| Used antibiotics       | 1.26  | 1.11 – 1.43 | <0.001 |
| Had MRSA               | 1.49  | 1.23 – 1.79 | <0.001 |
| Male                   | 1.32  | 1.18 – 1.48 | <0.001 |
| Culture drawn at ER    | 1.41  | 0.91 – 2.19 | 0.126  |
| Observations           | 11592 |             |        |

**Table S3.** Estimates of the standard logistic model fitted to the original data. (/3): results presented per 3 unit increase in the covariate; (/5): results presented per 5 unit increase in the covariate.

| <i>Covariate</i>                     | <b>Culture drawn at ER model</b> |                        |                |
|--------------------------------------|----------------------------------|------------------------|----------------|
|                                      | <i>Odds Ratios</i>               | <i>Conf. Int (95%)</i> | <i>P-Value</i> |
| Intercept                            | 0.09                             | 0.07 – 0.12            | <0.001         |
| Age (/5)                             | 0.98                             | 0.97 – 1.00            | 0.017          |
| Times hospitalized past year (/3)    | 1.24                             | 1.11 – 1.38            | <0.001         |
| Had Acinetobacter                    | 2.07                             | 1.25 – 3.40            | 0.004          |
| Had Pseudomonas                      | 1.96                             | 1.39 – 2.77            | <0.001         |
| Had CRE                              | 1.54                             | 0.80 – 2.96            | 0.191          |
| Had VRE                              | 0.64                             | 0.26 – 1.57            | 0.329          |
| Had ESBL                             | 2.61                             | 2.32 – 2.95            | <0.001         |
| Had KPC                              | 1.79                             | 1.23 – 2.61            | 0.002          |
| Culture drawn at the surgical unit   | 0.97                             | 0.83 – 1.13            | 0.672          |
| Culture drawn at the orthopedic unit | 1.41                             | 1.14 – 1.76            | 0.002          |
| Culture drawn at the obstetrics unit | 1.13                             | 0.61 – 2.08            | 0.697          |
| Culture drawn at other unit          | 0.65                             | 0.46 – 0.90            | 0.010          |
| Had catheter                         | 1.26                             | 1.10 – 1.45            | 0.001          |
| Nosocomial                           | 1.27                             | 1.12 – 1.44            | <0.001         |
| Arrived from an institution          | 1.44                             | 1.24 – 1.67            | <0.001         |
| Arrived from a medical clinic        | 0.95                             | 0.51 – 1.77            | 0.875          |
| Arrived from another hospital        | 1.33                             | 0.98 – 1.82            | 0.067          |
| Arrived from: unknown                | 0.99                             | 0.66 – 1.47            | 0.955          |
| Arrived from: other                  | 0.97                             | 0.78 – 1.20            | 0.767          |
| Diabetes                             | 1.03                             | 0.90 – 1.19            | 0.656          |
| Immunosuppression                    | 1.23                             | 0.95 – 1.59            | 0.114          |
| Sample location: unknown             | 0.61                             | 0.50 – 0.74            | <0.001         |
| Sample location: sputum              | 0.45                             | 0.34 – 0.59            | <0.001         |
| Sample location: wound               | 0.95                             | 0.80 – 1.12            | 0.539          |
| Sample location: blood               | 0.77                             | 0.64 – 0.93            | 0.005          |
| Sample location: other               | 0.71                             | 0.27 – 1.85            | 0.487          |
| Genus: Entrobacter                   | 0.46                             | 0.31 – 0.67            | <0.001         |
| Genus: Citrobacter                   | 0.10                             | 0.04 – 0.25            | <0.001         |
| Genus: Pseudomonas                   | 0.80                             | 0.68 – 0.95            | 0.009          |

|                        |       |             |        |
|------------------------|-------|-------------|--------|
| Genus: Proteus         | 1.60  | 1.34 – 1.90 | <0.001 |
| Genus: Klebsiella      | 1.61  | 1.39 – 1.86 | <0.001 |
| Genus: Morganella      | 0.81  | 0.58 – 1.13 | 0.207  |
| Used antibiotics       | 1.26  | 1.11 – 1.44 | <0.001 |
| Had MRSA               | 1.49  | 1.23 – 1.80 | <0.001 |
| Male                   | 1.32  | 1.18 – 1.47 | <0.001 |
| S(Culture drawn at ER) |       |             | 0.001  |
| <hr/>                  |       |             |        |
| Observations           | 11592 |             |        |

**Table S4.** Estimates of *Culture drawn at ER* model fitted to the original data. S(Culture drawn at ER): The time-varying coefficient of *Culture drawn at ER*, testing if this coefficient equals zero for all  $t$ ; (/3): results presented per 3 unit increase in the covariate; (/5): results presented per 5 unit increase in the covariate.

| <i>Covariate</i>                     | <b>Male model</b>  |                        |                |
|--------------------------------------|--------------------|------------------------|----------------|
|                                      | <i>Odds Ratios</i> | <i>Conf. Int (95%)</i> | <i>P-Value</i> |
| Intercept                            | 0.09               | 0.07 – 0.12            | <0.001         |
| Age (/5)                             | 0.98               | 0.97 – 1.00            | 0.037          |
| Times hospitalized past year (/3)    | 1.24               | 1.11 – 1.39            | <0.001         |
| Had Acinetobacter                    | 2.06               | 1.25 – 3.40            | 0.005          |
| Had Pseudomonas                      | 1.97               | 1.40 – 2.79            | <0.001         |
| Had CRE                              | 1.59               | 0.82 – 3.08            | 0.166          |
| Had VRE                              | 0.57               | 0.23 – 1.43            | 0.233          |
| Had ESBL                             | 2.62               | 2.32 – 2.96            | <0.001         |
| Had KPC                              | 1.81               | 1.24 – 2.64            | 0.002          |
| Culture drawn at the surgical unit   | 0.94               | 0.80 – 1.10            | 0.466          |
| Culture drawn at the orthopedic unit | 1.38               | 1.11 – 1.72            | 0.004          |
| Culture drawn at the obstetrics unit | 1.11               | 0.60 – 2.05            | 0.731          |
| Culture drawn at other unit          | 0.65               | 0.46 – 0.91            | 0.012          |
| Had catheter                         | 1.24               | 1.08 – 1.42            | 0.003          |
| Nosocomial                           | 1.27               | 1.12 – 1.44            | <0.001         |
| Arrived from an institution          | 1.43               | 1.24 – 1.67            | <0.001         |
| Arrived from a medical clinic        | 0.98               | 0.53 – 1.83            | 0.952          |
| Arrived from another hospital        | 1.36               | 1.00 – 1.86            | 0.051          |
| Arrived from: unknown                | 1.00               | 0.67 – 1.49            | 0.987          |
| Arrived from: other                  | 0.95               | 0.77 – 1.18            | 0.648          |
| Diabetes                             | 1.00               | 0.86 – 1.16            | 0.984          |
| Immunosuppression                    | 1.22               | 0.94 – 1.58            | 0.127          |
| Sample location: unknown             | 0.64               | 0.53 – 0.78            | <0.001         |
| Sample location: sputum              | 0.46               | 0.35 – 0.60            | <0.001         |
| Sample location: wound               | 0.96               | 0.81 – 1.14            | 0.673          |
| Sample location: blood               | 0.78               | 0.65 – 0.94            | 0.008          |
| Sample location: other               | 0.70               | 0.27 – 1.81            | 0.460          |
| Genus: Entrobacter                   | 0.46               | 0.31 – 0.67            | <0.001         |
| Genus: Citrobacter                   | 0.10               | 0.04 – 0.24            | <0.001         |
| Genus: Pseudomonas                   | 0.81               | 0.69 – 0.96            | 0.013          |

|                     |       |             |        |
|---------------------|-------|-------------|--------|
| Genus: Proteus      | 1.61  | 1.35 – 1.91 | <0.001 |
| Genus: Klebsiella   | 1.61  | 1.39 – 1.86 | <0.001 |
| Genus: Morganella   | 0.79  | 0.57 – 1.11 | 0.174  |
| Used antibiotics    | 1.25  | 1.10 – 1.42 | <0.001 |
| Had MRSA            | 1.51  | 1.25 – 1.82 | <0.001 |
| Culture drawn at ER | 1.38  | 0.89 – 2.13 | 0.151  |
| S(Male)             |       |             | <0.001 |
| <hr/>               |       |             |        |
| Observations        | 11592 |             |        |

**Table S5.** Estimates of *Male* model fitted to the original data. S(Male): The time-varying coefficient of *Male*, testing if this coefficient equals zero for all  $t$ ; (/3): results presented per 3 unit increase in the covariate; (/5): results presented per 5 unit increase in the covariate.

| <i>Covariate</i>                     | <b>Used antibiotics model</b> |                        |                |
|--------------------------------------|-------------------------------|------------------------|----------------|
|                                      | <i>Odds Ratios</i>            | <i>Conf. Int (95%)</i> | <i>P-Value</i> |
| Intercept                            | 0.09                          | 0.07 – 0.12            | <0.001         |
| Age (/5)                             | 0.98                          | 0.97 – 1.00            | 0.026          |
| Times hospitalized past year (/3)    | 1.25                          | 1.12 – 1.39            | <0.001         |
| Had Acinetobacter                    | 2.02                          | 1.22 – 3.33            | 0.006          |
| Had Pseudomonas                      | 1.94                          | 1.37 – 2.73            | <0.001         |
| Had CRE                              | 1.51                          | 0.79 – 2.90            | 0.214          |
| Had VRE                              | 0.64                          | 0.26 – 1.57            | 0.325          |
| Had ESBL                             | 2.61                          | 2.32 – 2.95            | <0.001         |
| Had KPC                              | 1.81                          | 1.24 – 2.63            | 0.002          |
| Culture drawn at the surgical unit   | 0.96                          | 0.82 – 1.12            | 0.612          |
| Culture drawn at the orthopedic unit | 1.40                          | 1.13 – 1.74            | 0.002          |
| Culture drawn at the obstetrics unit | 1.14                          | 0.62 – 2.10            | 0.681          |
| Culture drawn at other unit          | 0.65                          | 0.47 – 0.91            | 0.012          |
| Had catheter                         | 1.26                          | 1.10 – 1.45            | 0.001          |
| Nosocomial                           | 1.26                          | 1.11 – 1.43            | <0.001         |
| Arrived from an institution          | 1.44                          | 1.24 – 1.67            | <0.001         |
| Arrived from a medical clinic        | 0.95                          | 0.51 – 1.78            | 0.882          |
| Arrived from another hospital        | 1.34                          | 0.98 – 1.82            | 0.065          |
| Arrived from: unknown                | 0.98                          | 0.66 – 1.47            | 0.928          |
| Arrived from: other                  | 0.98                          | 0.79 – 1.21            | 0.849          |
| Diabetes                             | 1.02                          | 0.88 – 1.18            | 0.767          |
| Immunosuppression                    | 1.23                          | 0.95 – 1.59            | 0.119          |
| Sample location: unknown             | 0.64                          | 0.53 – 0.78            | <0.001         |
| Sample location: sputum              | 0.45                          | 0.35 – 0.59            | <0.001         |
| Sample location: wound               | 0.97                          | 0.82 – 1.14            | 0.692          |
| Sample location: blood               | 0.77                          | 0.65 – 0.93            | 0.006          |
| Sample location: other               | 0.72                          | 0.28 – 1.86            | 0.496          |
| Genus: Entrobacter                   | 0.46                          | 0.31 – 0.67            | <0.001         |
| Genus: Citrobacter                   | 0.10                          | 0.04 – 0.25            | <0.001         |
| Genus: Pseudomonas                   | 0.81                          | 0.69 – 0.95            | 0.012          |

|                     |       |             |        |
|---------------------|-------|-------------|--------|
| Genus: Proteus      | 1.61  | 1.35 – 1.91 | <0.001 |
| Genus: Klebsiella   | 1.61  | 1.40 – 1.87 | <0.001 |
| Genus: Morganella   | 0.80  | 0.58 – 1.12 | 0.191  |
| Had MRSA            | 1.49  | 1.23 – 1.80 | <0.001 |
| Culture drawn at ER | 1.41  | 0.91 – 2.19 | 0.122  |
| Male                | 1.32  | 1.18 – 1.48 | <0.001 |
| S(Used antibiotics) |       |             | 0.004  |
| <hr/>               |       |             |        |
| Observations        | 11592 |             |        |

**Table S6.** Estimates of *Used antibiotics* model fitted to the original data. S(Used antibiotics): The time-varying coefficient of *Used antibiotics*, testing if this coefficient equals zero for all  $t$ ; (/3): results presented per 3 unit increase in the covariate; (/5): results presented per 5 unit increase in the covariate.

| <i>Covariate</i>                     | <b>Had MRSA model</b> |                        |                |
|--------------------------------------|-----------------------|------------------------|----------------|
|                                      | <i>Odds Ratios</i>    | <i>Conf. Int (95%)</i> | <i>P-Value</i> |
| Intercept                            | 0.09                  | 0.07 – 0.12            | <0.001         |
| Age (/5)                             | 0.98                  | 0.97 – 1.00            | 0.027          |
| Times hospitalized past year (/3)    | 1.24                  | 1.11 – 1.38            | <0.001         |
| Had Acinetobacter                    | 2.05                  | 1.24 – 3.39            | 0.005          |
| Had Pseudomonas                      | 1.96                  | 1.39 – 2.77            | <0.001         |
| Had CRE                              | 1.56                  | 0.82 – 3.00            | 0.177          |
| Had VRE                              | 0.62                  | 0.25 – 1.56            | 0.312          |
| Had ESBL                             | 2.62                  | 2.32 – 2.95            | <0.001         |
| Had KPC                              | 1.79                  | 1.23 – 2.61            | 0.002          |
| Culture drawn at the surgical unit   | 0.96                  | 0.82 – 1.12            | 0.602          |
| Culture drawn at the orthopedic unit | 1.42                  | 1.14 – 1.77            | 0.002          |
| Culture drawn at the obstetrics unit | 1.14                  | 0.62 – 2.09            | 0.682          |
| Culture drawn at other unit          | 0.65                  | 0.47 – 0.91            | 0.012          |
| Had catheter                         | 1.25                  | 1.09 – 1.44            | 0.001          |
| Nosocomial                           | 1.26                  | 1.11 – 1.43            | <0.001         |
| Arrived from an institution          | 1.43                  | 1.23 – 1.66            | <0.001         |
| Arrived from a medical clinic        | 0.96                  | 0.52 – 1.79            | 0.910          |
| Arrived from another hospital        | 1.33                  | 0.98 – 1.81            | 0.070          |
| Arrived from: unknown                | 0.98                  | 0.66 – 1.47            | 0.939          |
| Arrived from: other                  | 0.97                  | 0.78 – 1.20            | 0.787          |
| Diabetes                             | 1.03                  | 0.89 – 1.19            | 0.696          |
| Immunosuppression                    | 1.23                  | 0.95 – 1.59            | 0.112          |
| Sample location: unknown             | 0.64                  | 0.53 – 0.78            | <0.001         |
| Sample location: sputum              | 0.45                  | 0.35 – 0.59            | <0.001         |
| Sample location: wound               | 0.96                  | 0.81 – 1.14            | 0.633          |
| Sample location: blood               | 0.78                  | 0.65 – 0.93            | 0.006          |
| Sample location: other               | 0.72                  | 0.28 – 1.86            | 0.493          |
| Genus: Entrobacter                   | 0.45                  | 0.31 – 0.67            | <0.001         |
| Genus: Citrobacter                   | 0.10                  | 0.04 – 0.24            | <0.001         |
| Genus: Pseudomonas                   | 0.81                  | 0.69 – 0.95            | 0.010          |



|                     |       |             |        |
|---------------------|-------|-------------|--------|
| Genus: Proteus      | 1.61  | 1.35 – 1.91 | <0.001 |
| Genus: Klebsiella   | 1.62  | 1.40 – 1.87 | <0.001 |
| Genus: Morganella   | 0.81  | 0.58 – 1.13 | 0.208  |
| Used antibiotics    | 1.26  | 1.11 – 1.43 | <0.001 |
| Culture drawn at ER | 1.41  | 0.91 – 2.19 | 0.120  |
| Male                | 1.32  | 1.18 – 1.48 | <0.001 |
| S(Had MRSA)         |       |             | <0.001 |
| <hr/>               |       |             |        |
| Observations        | 11592 |             |        |

**Table S7.** Estimates of *Had MRSA* model fitted to the original data. *S(Had MRSA)*: The time-varying coefficient of *Had MRSA*, testing if this coefficient equals zero for all *t*; (*/3*): results presented per 3 unit increase in the covariate; (*/5*): results presented per 5 unit increase in the covariate.

| <i>Covariate</i>                     | <b>Culture drawn at ER model</b> |                        |                |
|--------------------------------------|----------------------------------|------------------------|----------------|
|                                      | <i>Odds Ratios</i>               | <i>Conf. Int (95%)</i> | <i>P-Value</i> |
| Intercept                            | 0.05                             | 0.03 – 0.07            | <0.001         |
| Age (/5)                             | 0.99                             | 0.97 – 1.01            | 0.433          |
| Times hospitalized past year (/3)    | 1.24                             | 1.06 – 1.45            | 0.006          |
| Had Acinetobacter                    | 2.47                             | 1.10 – 5.57            | 0.029          |
| Had Pseudomonas                      | 1.71                             | 0.94 – 3.13            | 0.079          |
| Had CRE                              | 0.65                             | 0.18 – 2.28            | 0.497          |
| Had VRE                              | 0.33                             | 0.07 – 1.64            | 0.176          |
| Had ESBL                             | 3.40                             | 2.83 – 4.08            | <0.001         |
| Had KPC                              | 1.64                             | 0.86 – 3.12            | 0.130          |
| Culture drawn at the surgical unit   | 1.05                             | 0.84 – 1.31            | 0.658          |
| Culture drawn at the orthopedic unit | 1.41                             | 1.03 – 1.93            | 0.031          |
| Culture drawn at the obstetrics unit | 1.10                             | 0.49 – 2.48            | 0.820          |
| Culture drawn at other unit          | 0.58                             | 0.37 – 0.91            | 0.018          |
| Had catheter                         | 1.28                             | 1.06 – 1.56            | 0.011          |
| Nosocomial                           | 1.24                             | 1.05 – 1.46            | 0.009          |
| Arrived from an institution          | 1.54                             | 1.24 – 1.92            | <0.001         |
| Arrived from a medical clinic        | 0.97                             | 0.42 – 2.23            | 0.937          |
| Arrived from another hospital        | 1.68                             | 1.06 – 2.67            | 0.029          |
| Arrived from: unknown                | 1.39                             | 0.82 – 2.36            | 0.216          |
| Arrived from: other                  | 0.99                             | 0.72 – 1.36            | 0.956          |
| Diabetes                             | 1.00                             | 0.81 – 1.23            | 0.976          |
| Immunosuppression                    | 0.99                             | 0.67 – 1.47            | 0.963          |
| Sample location: unknown             | 0.59                             | 0.46 – 0.76            | <0.001         |
| Sample location: sputum              | 0.41                             | 0.29 – 0.57            | <0.001         |
| Sample location: wound               | 0.90                             | 0.72 – 1.13            | 0.378          |
| Sample location: blood               | 0.82                             | 0.65 – 1.03            | 0.082          |
| Sample location: other               | 0.82                             | 0.27 – 2.52            | 0.733          |
| Genus: Entrobacter                   | 0.47                             | 0.30 – 0.74            | 0.001          |
| Genus: Citrobacter                   | 0.08                             | 0.03 – 0.22            | <0.001         |
| Genus: Pseudomonas                   | 0.80                             | 0.65 – 0.98            | 0.030          |

|                        |       |             |        |
|------------------------|-------|-------------|--------|
| Genus: Proteus         | 1.48  | 1.19 – 1.85 | 0.001  |
| Genus: Klebsiella      | 1.76  | 1.46 – 2.13 | <0.001 |
| Genus: Morganella      | 0.74  | 0.50 – 1.11 | 0.149  |
| Used antibiotics       | 1.33  | 1.12 – 1.57 | 0.001  |
| Had MRSA               | 1.52  | 1.13 – 2.07 | 0.007  |
| Male                   | 1.40  | 1.19 – 1.65 | <0.001 |
| S(Culture drawn at ER) |       |             | 0.026  |
| Random intercept       |       |             | <0.001 |
| <hr/>                  |       |             |        |
| Observations           | 11592 |             |        |

**Table S8.** Estimates of *Culture drawn at ER* model with a random intercept fitted to the original data. S(Culture drawn at ER): The time-varying coefficient of *Culture drawn at ER*, testing if this coefficient equals zero for all  $t$ ; (/3): results presented per 3 unit increase in the covariate; (/5): results presented per 5 unit increase in the covariate. The variance of the random intercept is 2.89 (95% confidence interval: 1.60, 1.90).

| <i>Covariate</i>                     | <b>Male model</b>  |                        |                |
|--------------------------------------|--------------------|------------------------|----------------|
|                                      | <i>Odds Ratios</i> | <i>Conf. Int (95%)</i> | <i>P-Value</i> |
| Intercept                            | 0.05               | 0.03 – 0.07            | <0.001         |
| Age (/5)                             | 0.99               | 0.97 – 1.02            | 0.549          |
| Times hospitalized past year (/3)    | 1.23               | 1.05 – 1.44            | 0.009          |
| Had Acinetobacter                    | 2.48               | 1.10 – 5.59            | 0.029          |
| Had Pseudomonas                      | 1.72               | 0.94 – 3.14            | 0.077          |
| Had CRE                              | 0.68               | 0.19 – 2.39            | 0.546          |
| Had VRE                              | 0.32               | 0.07 – 1.59            | 0.165          |
| Had ESBL                             | 3.46               | 2.87 – 4.15            | <0.001         |
| Had KPC                              | 1.60               | 0.84 – 3.05            | 0.149          |
| Culture drawn at the surgical unit   | 1.02               | 0.82 – 1.28            | 0.832          |
| Culture drawn at the orthopedic unit | 1.37               | 1.00 – 1.88            | 0.047          |
| Culture drawn at the obstetrics unit | 1.08               | 0.48 – 2.44            | 0.857          |
| Culture drawn at other unit          | 0.57               | 0.37 – 0.90            | 0.015          |
| Had catheter                         | 1.26               | 1.04 – 1.53            | 0.018          |
| Nosocomial                           | 1.24               | 1.05 – 1.45            | 0.010          |
| Arrived from an institution          | 1.55               | 1.24 – 1.93            | <0.001         |
| Arrived from a medical clinic        | 0.96               | 0.42 – 2.22            | 0.932          |
| Arrived from another hospital        | 1.70               | 1.07 – 2.70            | 0.026          |
| Arrived from: unknown                | 1.41               | 0.83 – 2.40            | 0.202          |
| Arrived from: other                  | 0.98               | 0.72 – 1.35            | 0.916          |
| Diabetes                             | 0.96               | 0.78 – 1.20            | 0.739          |
| Immunosuppression                    | 0.97               | 0.65 – 1.45            | 0.892          |
| Sample location: unknown             | 0.63               | 0.49 – 0.80            | <0.001         |
| Sample location: sputum              | 0.41               | 0.30 – 0.58            | <0.001         |
| Sample location: wound               | 0.93               | 0.74 – 1.16            | 0.496          |
| Sample location: blood               | 0.83               | 0.66 – 1.04            | 0.106          |
| Sample location: other               | 0.81               | 0.26 – 2.48            | 0.712          |
| Genus: Entrobacter                   | 0.47               | 0.30 – 0.73            | 0.001          |
| Genus: Citrobacter                   | 0.08               | 0.03 – 0.22            | <0.001         |
| Genus: Pseudomonas                   | 0.80               | 0.65 – 0.98            | 0.032          |

|                     |       |             |        |
|---------------------|-------|-------------|--------|
| Genus: Proteus      | 1.48  | 1.19 – 1.85 | 0.001  |
| Genus: Klebsiella   | 1.77  | 1.47 – 2.14 | <0.001 |
| Genus: Morganella   | 0.74  | 0.49 – 1.10 | 0.134  |
| Used antibiotics    | 1.32  | 1.12 – 1.57 | 0.001  |
| Had MRSA            | 1.54  | 1.13 – 2.08 | 0.006  |
| Culture drawn at ER | 1.17  | 0.66 – 2.06 | 0.598  |
| S(Male)             |       |             | <0.001 |
| Random intercept    |       |             | <0.001 |
| <hr/>               |       |             |        |
| Observations        | 11592 |             |        |

**Table S9.** Estimates of *Male* model with a random intercept fitted to the original data. S(Male): The time-varying coefficient of *Male*, testing if this coefficient equals zero for all  $t$ ; (/3): results presented per 3 unit increase in the covariate; (/5): results presented per 5 unit increase in the covariate. The variance of the random intercept is 2.89 (95% confidence interval: 1.60, 1.90).

| <i>Covariate</i>                     | <b>Used antibiotics model</b> |                        |                |
|--------------------------------------|-------------------------------|------------------------|----------------|
|                                      | <i>Odds Ratios</i>            | <i>Conf. Int (95%)</i> | <i>P-Value</i> |
| Intercept                            | 0.05                          | 0.03 – 0.07            | <0.001         |
| Age (/5)                             | 0.99                          | 0.97 – 1.02            | 0.525          |
| Times hospitalized past year (/3)    | 1.24                          | 1.06 – 1.45            | 0.006          |
| Had Acinetobacter                    | 2.45                          | 1.09 – 5.52            | 0.031          |
| Had Pseudomonas                      | 1.70                          | 0.93 – 3.11            | 0.083          |
| Had CRE                              | 0.64                          | 0.18 – 2.26            | 0.487          |
| Had VRE                              | 0.34                          | 0.07 – 1.66            | 0.180          |
| Had ESBL                             | 3.41                          | 2.84 – 4.10            | <0.001         |
| Had KPC                              | 1.64                          | 0.86 – 3.11            | 0.132          |
| Culture drawn at the surgical unit   | 1.04                          | 0.84 – 1.30            | 0.708          |
| Culture drawn at the orthopedic unit | 1.40                          | 1.02 – 1.91            | 0.036          |
| Culture drawn at the obstetrics unit | 1.11                          | 0.49 – 2.52            | 0.798          |
| Culture drawn at other unit          | 0.59                          | 0.38 – 0.92            | 0.021          |
| Had catheter                         | 1.28                          | 1.05 – 1.55            | 0.013          |
| Nosocomial                           | 1.23                          | 1.05 – 1.45            | 0.011          |
| Arrived from an institution          | 1.54                          | 1.24 – 1.92            | <0.001         |
| Arrived from a medical clinic        | 0.97                          | 0.42 – 2.24            | 0.949          |
| Arrived from another hospital        | 1.68                          | 1.06 – 2.67            | 0.029          |
| Arrived from: unknown                | 1.38                          | 0.82 – 2.35            | 0.229          |
| Arrived from: other                  | 0.99                          | 0.73 – 1.36            | 0.975          |
| Diabetes                             | 0.99                          | 0.80 – 1.23            | 0.937          |
| Immunosuppression                    | 0.98                          | 0.66 – 1.46            | 0.933          |
| Sample location: unknown             | 0.62                          | 0.49 – 0.80            | <0.001         |
| Sample location: sputum              | 0.41                          | 0.29 – 0.58            | <0.001         |
| Sample location: wound               | 0.92                          | 0.74 – 1.15            | 0.467          |
| Sample location: blood               | 0.83                          | 0.66 – 1.03            | 0.094          |
| Sample location: other               | 0.82                          | 0.27 – 2.53            | 0.736          |
| Genus: Entrobacter                   | 0.47                          | 0.30 – 0.73            | 0.001          |
| Genus: Citrobacter                   | 0.08                          | 0.03 – 0.22            | <0.001         |
| Genus: Pseudomonas                   | 0.80                          | 0.65 – 0.98            | 0.034          |

|                     |       |             |        |
|---------------------|-------|-------------|--------|
| Genus: Proteus      | 1.48  | 1.19 – 1.85 | <0.001 |
| Genus: Klebsiella   | 1.77  | 1.47 – 2.13 | <0.001 |
| Genus: Morganella   | 0.74  | 0.50 – 1.11 | 0.146  |
| Had MRSA            | 1.52  | 1.12 – 2.06 | 0.007  |
| Culture drawn at ER | 1.20  | 0.68 – 2.12 | 0.539  |
| Male                | 1.41  | 1.19 – 1.66 | <0.001 |
| S(Used antibiotics) |       |             | 0.006  |
| Random intercept    |       |             | <0.001 |
| <hr/>               |       |             |        |
| Observations        | 11592 |             |        |

**Table S10.** Estimates of *Used antibiotics* model with a random intercept fitted to the original data. S(Used antibiotics): The time-varying coefficient of *Used antibiotics*, testing if this coefficient equals zero for all  $t$ ; (/3): results presented per 3 unit increase in the covariate; (/5): results presented per 5 unit increase in the covariate. The variance of the random intercept is 2.89 (95% confidence interval: 1.60, 1.90).

| <i>Covariate</i>                     | <b>Had MRSA model</b> |                        |                |
|--------------------------------------|-----------------------|------------------------|----------------|
|                                      | <i>Odds Ratios</i>    | <i>Conf. Int (95%)</i> | <i>P-Value</i> |
| Intercept                            | 0.05                  | 0.03 – 0.07            | <0.001         |
| Age (/5)                             | 0.99                  | 0.97 – 1.02            | 0.533          |
| Times hospitalized past year (/3)    | 1.24                  | 1.06 – 1.44            | 0.007          |
| Had Acinetobacter                    | 2.47                  | 1.09 – 5.58            | 0.030          |
| Had Pseudomonas                      | 1.73                  | 0.95 – 3.16            | 0.075          |
| Had CRE                              | 0.65                  | 0.18 – 2.32            | 0.512          |
| Had VRE                              | 0.30                  | 0.06 – 1.55            | 0.150          |
| Had ESBL                             | 3.41                  | 2.83 – 4.09            | <0.001         |
| Had KPC                              | 1.64                  | 0.86 – 3.12            | 0.133          |
| Culture drawn at the surgical unit   | 1.04                  | 0.84 – 1.30            | 0.707          |
| Culture drawn at the orthopedic unit | 1.43                  | 1.04 – 1.95            | 0.027          |
| Culture drawn at the obstetrics unit | 1.12                  | 0.49 – 2.53            | 0.789          |
| Culture drawn at other unit          | 0.59                  | 0.38 – 0.93            | 0.022          |
| Had catheter                         | 1.27                  | 1.05 – 1.54            | 0.014          |
| Nosocomial                           | 1.23                  | 1.04 – 1.44            | 0.013          |
| Arrived from an institution          | 1.55                  | 1.24 – 1.92            | <0.001         |
| Arrived from a medical clinic        | 0.99                  | 0.43 – 2.27            | 0.978          |
| Arrived from another hospital        | 1.68                  | 1.05 – 2.67            | 0.029          |
| Arrived from: unknown                | 1.38                  | 0.81 – 2.34            | 0.232          |
| Arrived from: other                  | 1.00                  | 0.73 – 1.37            | 0.982          |
| Diabetes                             | 1.00                  | 0.81 – 1.24            | 0.990          |
| Immunosuppression                    | 0.98                  | 0.66 – 1.46            | 0.932          |
| Sample location: unknown             | 0.62                  | 0.49 – 0.79            | <0.001         |
| Sample location: sputum              | 0.41                  | 0.30 – 0.58            | <0.001         |
| Sample location: wound               | 0.92                  | 0.73 – 1.15            | 0.457          |
| Sample location: blood               | 0.83                  | 0.66 – 1.03            | 0.093          |
| Sample location: other               | 0.82                  | 0.27 – 2.53            | 0.736          |
| Genus: Entrobacter                   | 0.47                  | 0.30 – 0.73            | 0.001          |
| Genus: Citrobacter                   | 0.08                  | 0.03 – 0.22            | <0.001         |
| Genus: Pseudomonas                   | 0.80                  | 0.65 – 0.98            | 0.032          |



|                     |       |             |        |
|---------------------|-------|-------------|--------|
| Genus: Proteus      | 1.49  | 1.19 – 1.85 | <0.001 |
| Genus: Klebsiella   | 1.78  | 1.47 – 2.14 | <0.001 |
| Genus: Morganella   | 0.75  | 0.50 – 1.12 | 0.161  |
| Used antibiotics    | 1.33  | 1.12 – 1.57 | 0.001  |
| Culture drawn at ER | 1.20  | 0.68 – 2.13 | 0.526  |
| Male                | 1.40  | 1.19 – 1.66 | <0.001 |
| S(Had MRSA)         |       |             | 0.026  |
| Random intercept    |       |             | <0.001 |
| <hr/>               |       |             |        |
| Observations        | 11592 |             |        |

**Table S11.** Estimates of *Had MRSA* model with a random intercept fitted to the original data.

*S(Had MRSA)*: The time-varying coefficient of *Had MRSA*, testing if this coefficient equals zero for all  $t$ ; (*/3*): results presented per 3 unit increase in the covariate; (*/5*): results presented per 5 unit increase in the covariate. The variance of the random intercept is 2.89 (95% confidence interval: 1.60, 1.90).

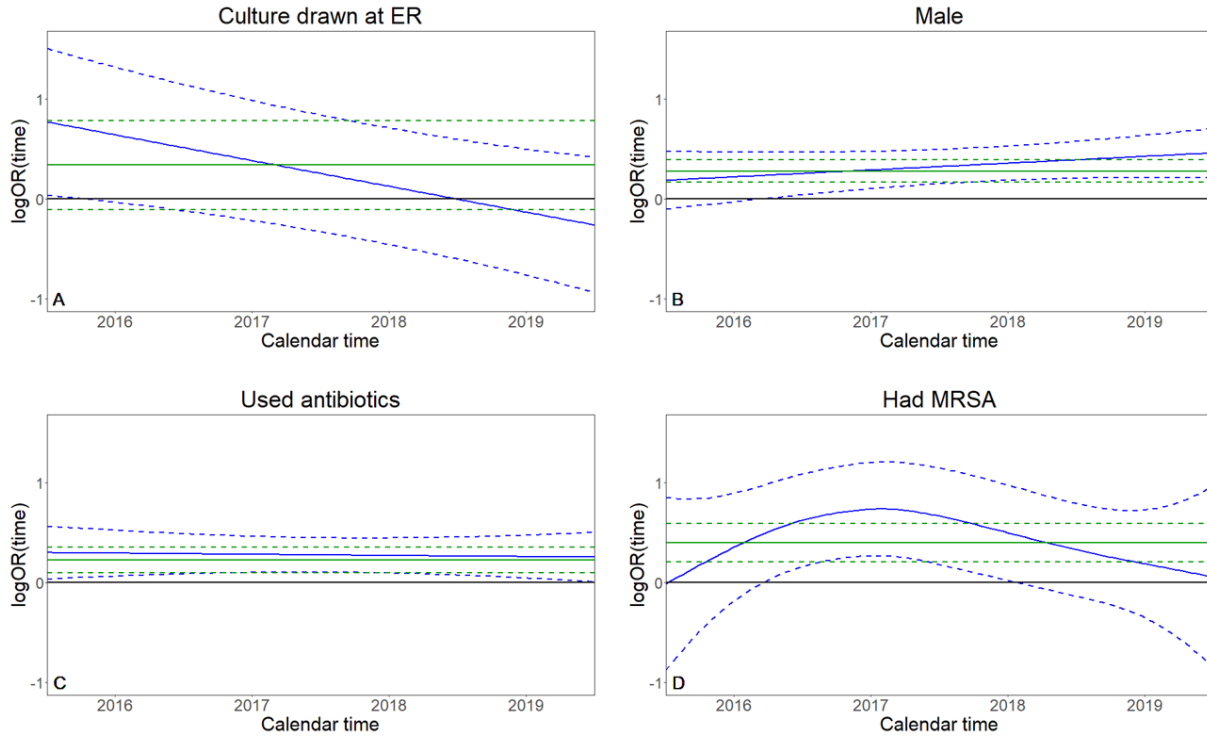

**Figure S1.** Estimates of the time-fixed (green) and time-varying (blue) coefficients from the four time-varying coefficient models with random intercepts and the single time-fixed model. Correspondingly, 95% Bayesian credible intervals and standard 95% confidence intervals are given in dashed lines. The horizontal axis represents the time in days between 2016 and 2019.

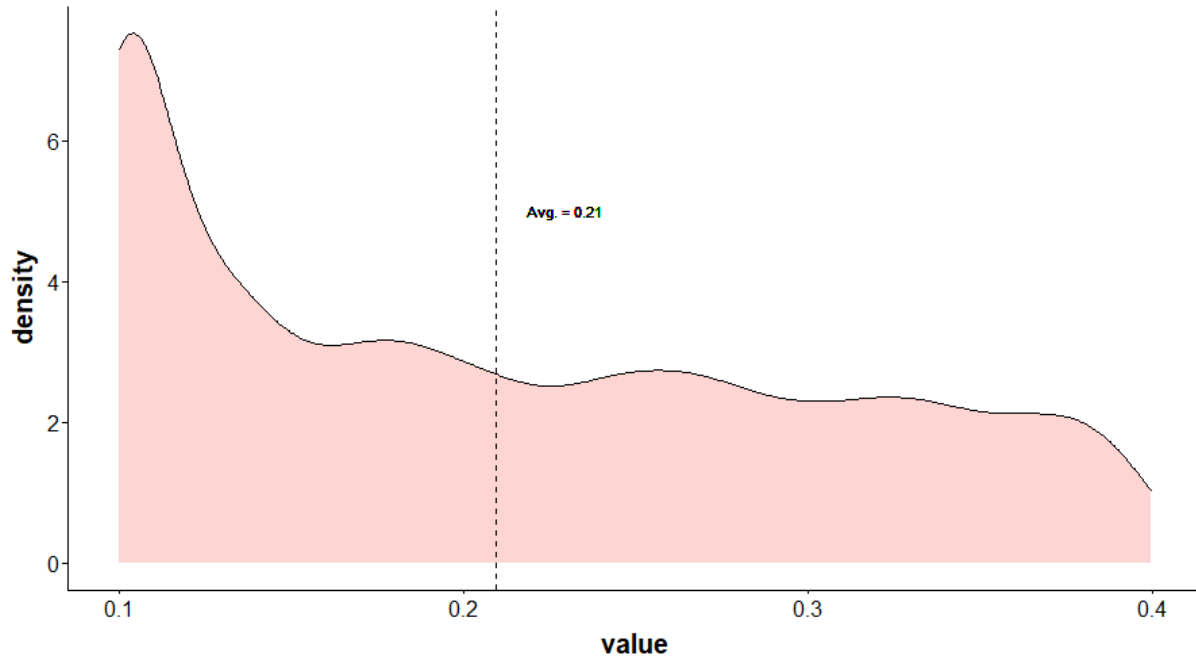

**Figure S2.** Density of  $p_t(\text{Community use} = 1)$  in our data, first simulation study. The values of  $t$  are the withdrawal times of bacterial cultures from the patients.

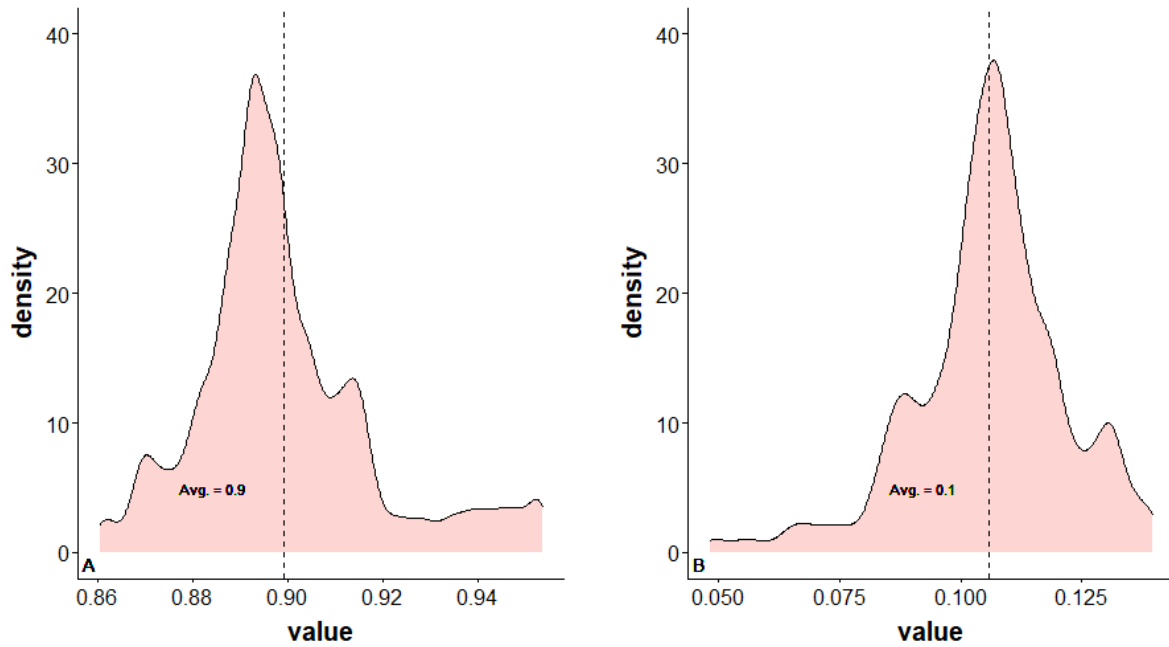

**Figure S3.** Density of  $p_t(\text{Arrived at ER} = k)$  in our data, where  $k \in \{0,1\}$ , first simulation study. Panel (A): The estimated density of  $p_t(\text{Arrived at ER} = 0)$ . Panel (B): The estimated density of  $p_t(\text{Arrived at ER} = 1)$ . The values of  $t$  are the withdrawal times of bacterial cultures from the patients. The probability  $p_t(\text{Arrived at ER} = k)$  was estimated from the Meir hospital data using a GAM.

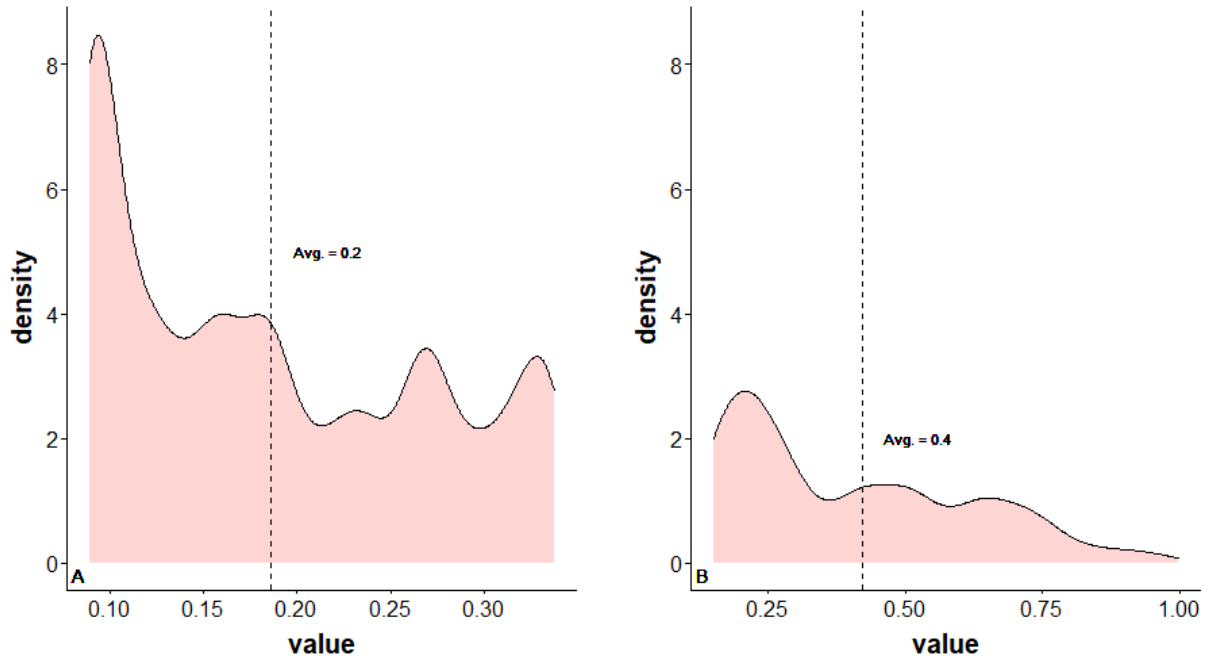

**Figure S4.** Density of  $p_t(\text{Community use} = 1 | \text{Arrived at ER} = k)$  in our data, where  $k \in \{0,1\}$  from Equation (3), first simulation study. Panel (A): The estimated density of  $p_t(\text{Community use} = 1 | \text{Arrived at ER} = 0)$ . Panel (B): The estimated density of  $p_t(\text{Community use} = 1 | \text{Arrived at ER} = 1)$ . The values of  $t$  are the withdrawal times of bacterial cultures from the patients. In the 15 rare instances when the sampled  $p_t(\text{Community use} = 1 | \text{Arrived at ER} = k) > 1$ , they were replaced by a uniform sample from  $[0.85, 1]$ .
